# Supplementary material for: Efficient Addition of Waste Glass in MK-Based Geopolymers: Microstructure, Antibacterial and Cytotoxicity Investigation
Source: MDPI journal article supplement (doi:10.3390/polym13091493), 2021-05-06
Supplement: s1 [file s1]

**Efficient addition of container waste glass in MK-based geo-polymers: microstructure, antibacterial and cytotoxicity investigation**

Giovanni Dal Poggetto<sup>1\*</sup>, Michelina Catauro<sup>2</sup>, Giuseppina Crescente<sup>3</sup> and Cristina Leonelli<sup>1</sup>

<sup>1</sup>Department of Engineering "Enzo Ferrari", University of Modena and Reggio Emilia, Via P. Vivarelli n. 10, 41125 Modena, Italy. [giovanni.dalpoggetto@unimore.it](mailto:giovanni.dalpoggetto@unimore.it); [cristina.leonelli@unimore.it](mailto:cristina.leonelli@unimore.it)

<sup>2</sup>Department of Industrial and Information Engineering, University of Campania "Luigi Vanvitelli", Via Roma n. 29, 81031 Aversa, Italy. [michelina.catauro@unicampania.it](mailto:michelina.catauro@unicampania.it)

<sup>3</sup>Department of Environmental, Biological and Pharmaceutical Sciences and Technologies, University of Campania "Luigi Vanvitelli", via Vivaldi n. 43, 81100 Caserta, Italy. [giuseppina.crescente@unicampania.it](mailto:giuseppina.crescente@unicampania.it)

\* Correspondence: [giovanni.dalpoggetto@unimore.it](mailto:giovanni.dalpoggetto@unimore.it)

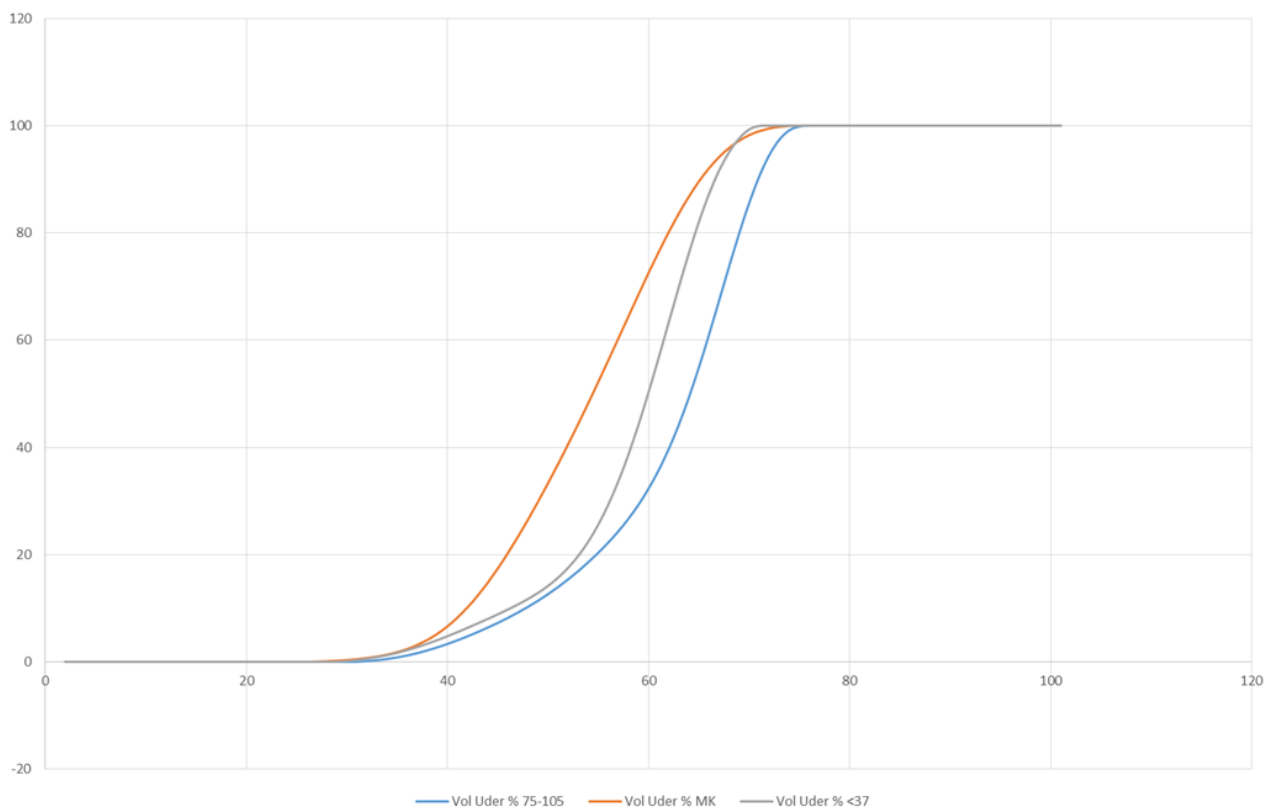

**Supplementary Figure S1.** Comparison of grain size curves of pure MK, waste glass in the two grains sizes: <37µm and 75-105µm.

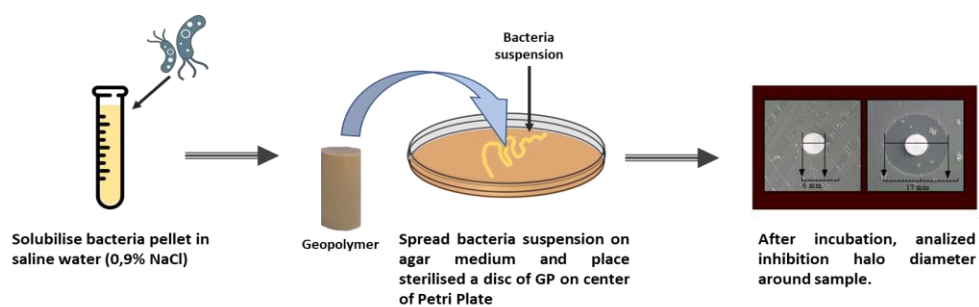

**Supplementary Figure S2.** Scheme showing the determination of the diameter of inhibition halos (IDs) .

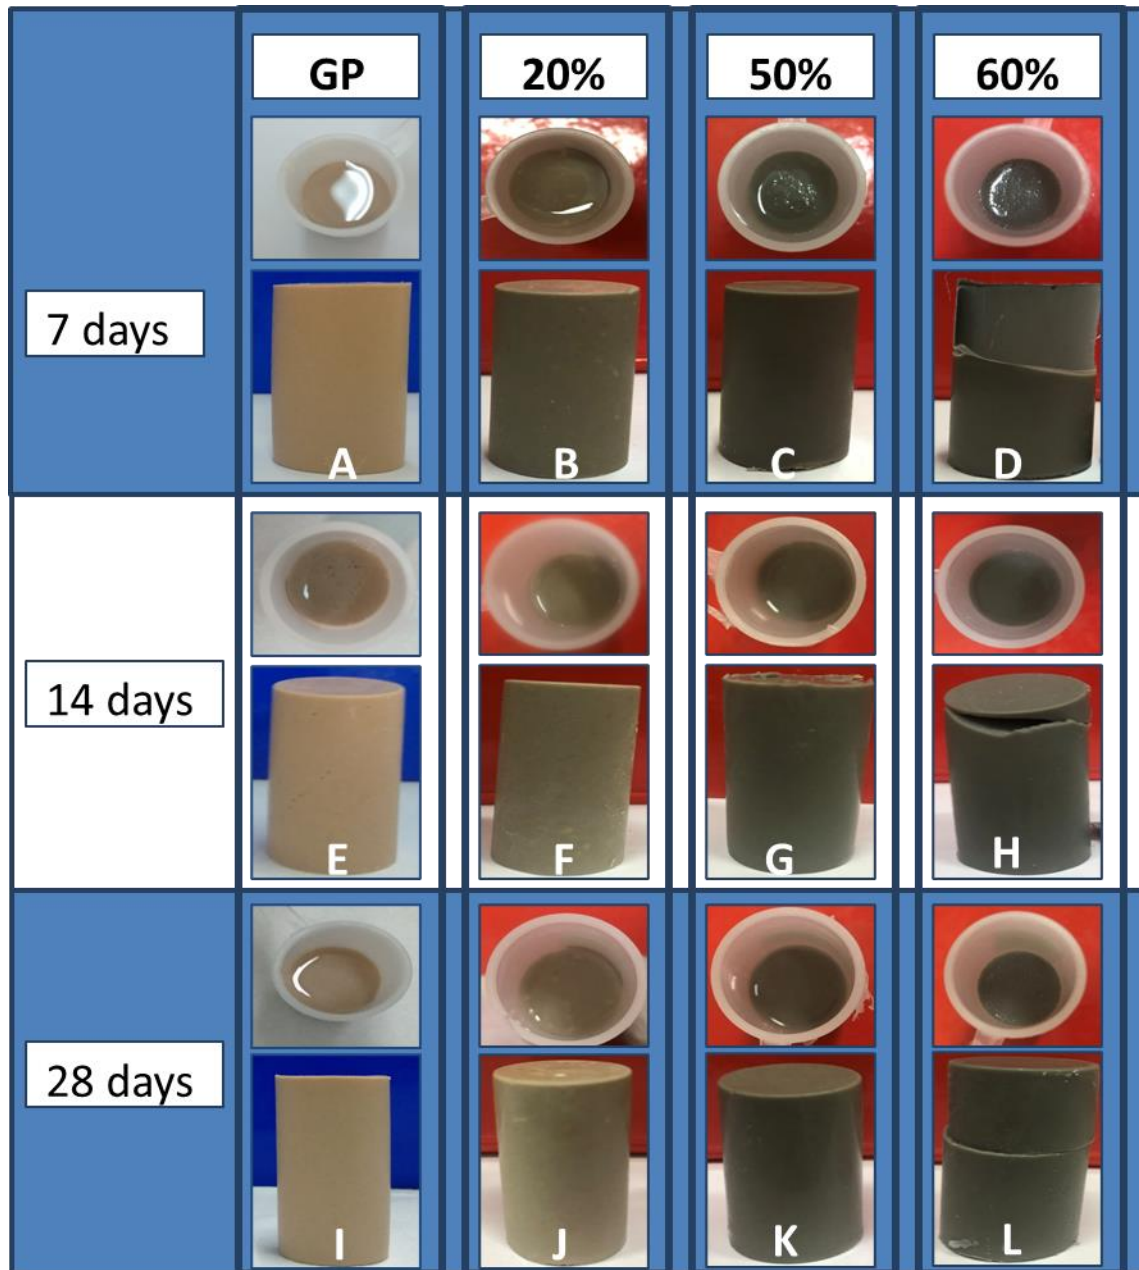

**Figure S3.** GP and GP/WG ( $37\mu\text{m} < d_{WG} < 53\mu\text{m}$ ) images inside the mould and after extraction for different curing times: a, b, c, d 7= days; e, f, g, h =14 days; i, j, k, l =28 days.

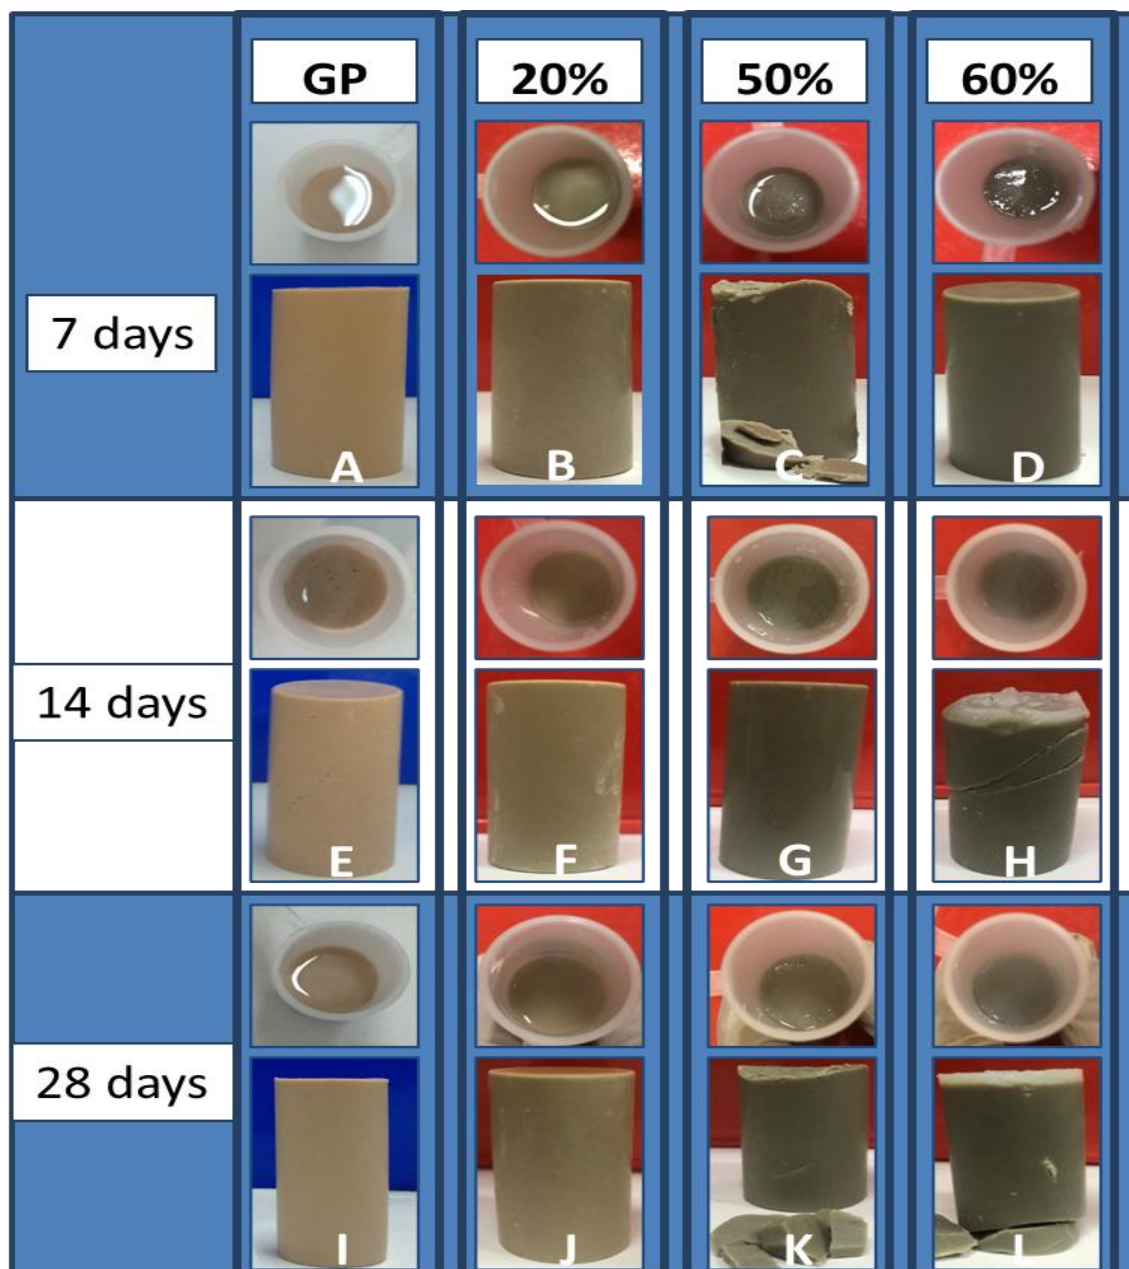

**Figure S4.** GP and GP/WG ( $75\mu\text{m} < d_{\text{WG}} < 105\mu\text{m}$ ) images inside the mould and after extraction for different curing times: a, b, c, d 7= days; e, f, g, h =14 days; i, j, k, l =28 days.

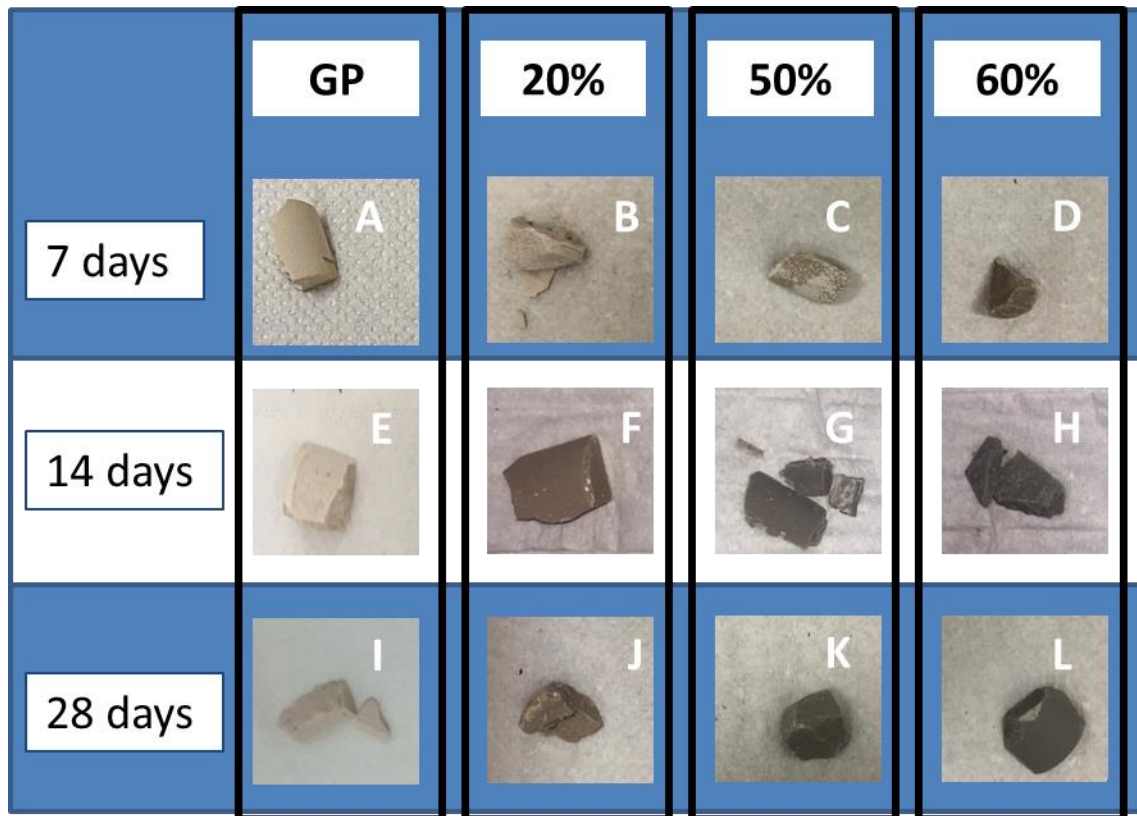

**Figure S5.** Integrity Test of GP and GP/WG ( $37\mu\text{m} < d_{\text{WG}} < 53\mu\text{m}$ ) after different curing times: s: a, b, c, d 7= days; e, f, g, h =14 days; i, j, k, l =28 days.

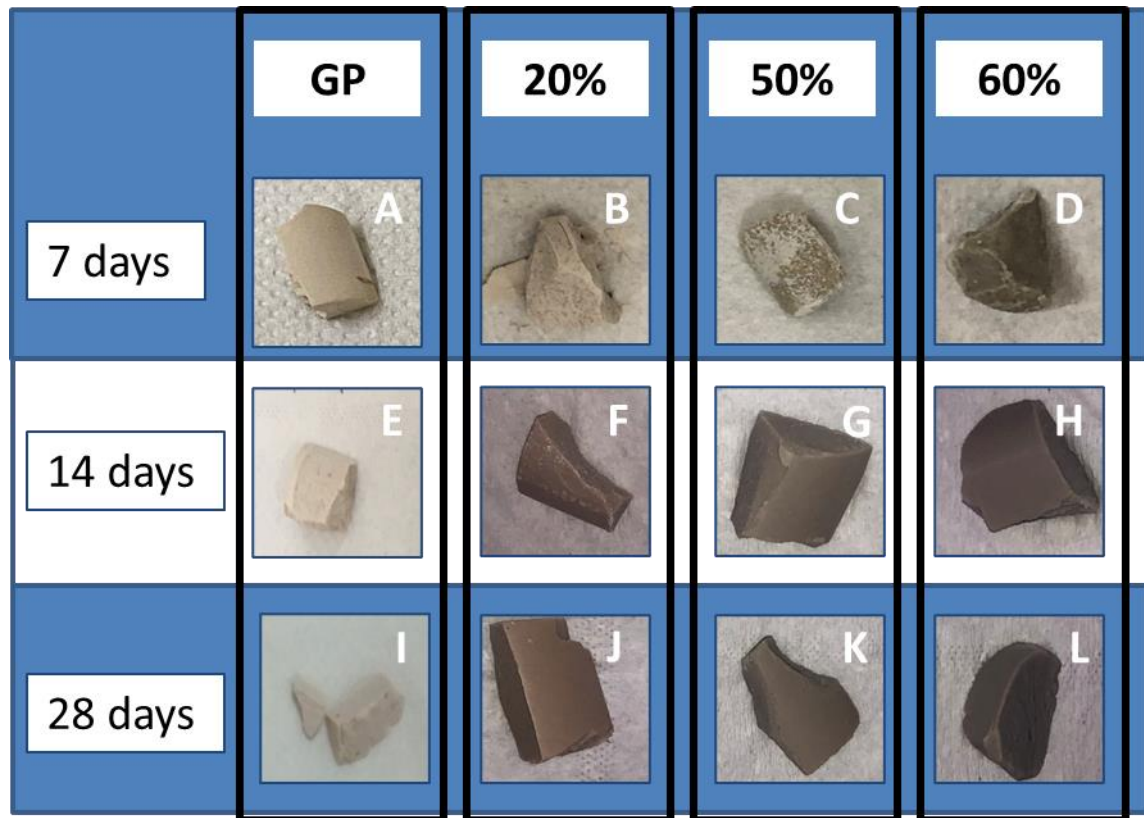

**Figure S6.** Integrity Test of GP and GP/WG ( $75\mu\text{m} < d_{\text{WG}} < 105\mu\text{m}$ ) after different curing times: s: a, b, c, d 7= days; e, f, g, h =14 days; i, j, k, l =28 days.

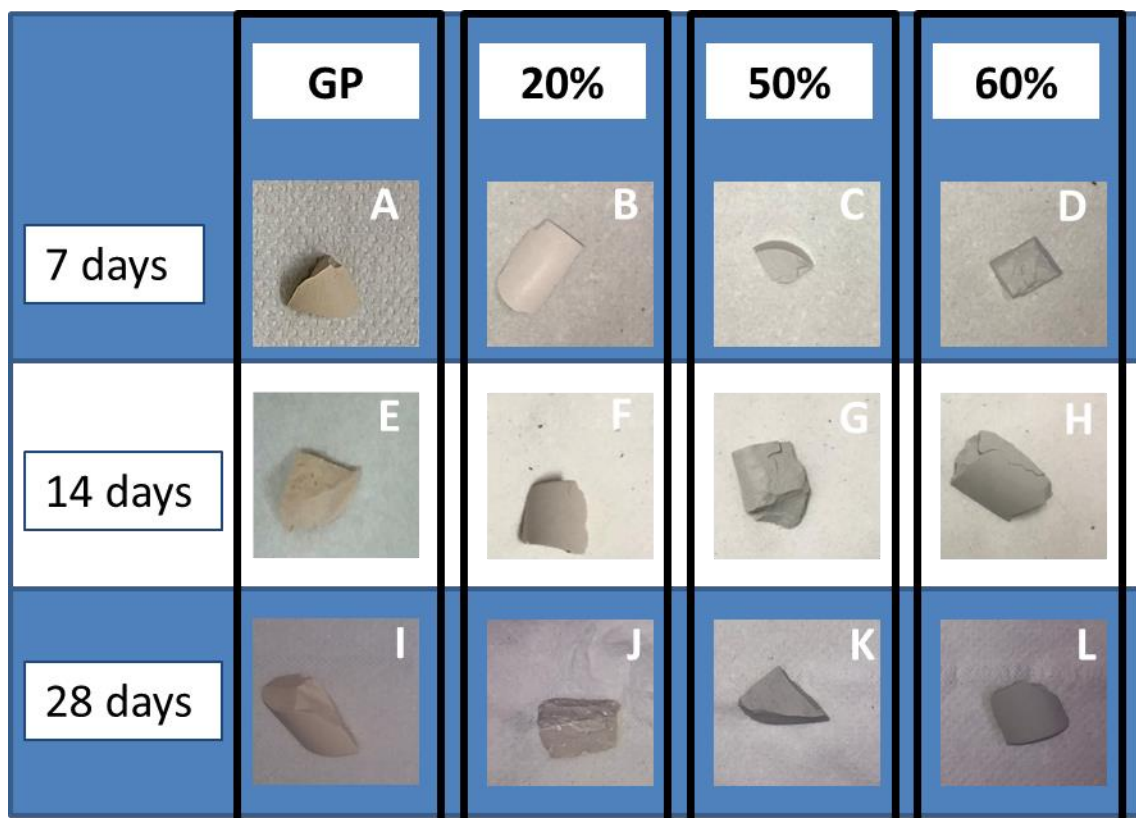

**Figure S7.** Weight loss of GP and GP/WG ( $37\mu\text{m} < d_{WG} < 53\mu\text{m}$ ); a, b, c, d represent GP and GP/WG for 7 days aging time; e, f, g, h represent samples after 14 days aging time; i, j, k, l show samples after 28 days aging time;



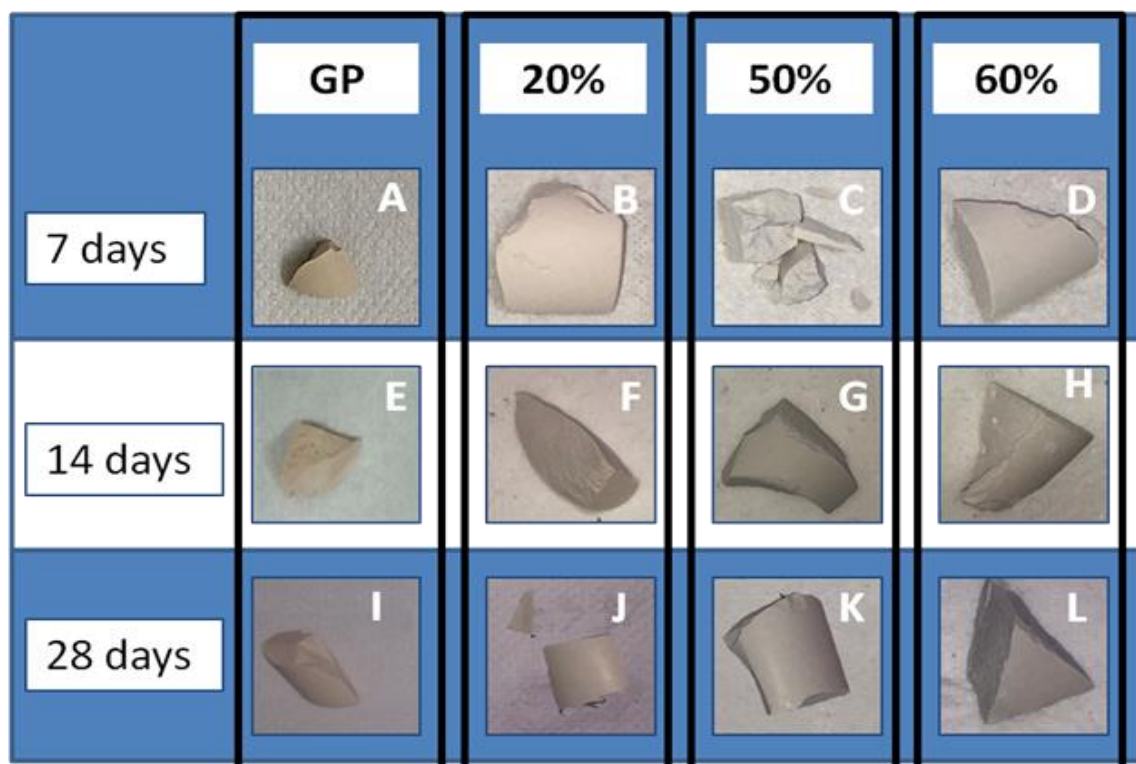

**Figure S8.** Weight loss of GP and GP/WG ( $75\mu\text{m} < d_{WG} < 105\mu\text{m}$ ); a, b, c, d represent GP and GP/WG for 7 days aging time; e, f, g, h represent samples after 14 days aging time; i, j, k, l show samples after 28 days aging time;

| Aging time (days) | Sample                   | Peak table |      |      |      |     |     |     |     |     |     |     |
|-------------------|--------------------------|------------|------|------|------|-----|-----|-----|-----|-----|-----|-----|
|                   | MK                       | 3440       | 1640 | -    | 1080 | -   | -   | 800 | -   | 694 | 560 | 470 |
|                   | WG                       | 3446       | 1640 | 1408 | 1040 | -   | -   | -   | 769 | 629 | -   | 474 |
| 7                 | GP                       | 3448       | 1650 | 1450 | 1013 | 950 | 881 | 800 | 721 | -   | 580 | 462 |
|                   | 20% 37-53 $\mu\text{m}$  | 3450       | 1649 | 1450 | 1009 | 950 | 880 | 800 | 721 | -   | 571 | 451 |
|                   | 20% 75-105 $\mu\text{m}$ | 3449       | 1647 | 1450 | 1011 | 950 | 882 | 800 | 719 | -   | 571 | 452 |
|                   | 50% 37-53 $\mu\text{m}$  | 3446       | 1647 | 1450 | 1007 | 950 | 880 | 800 | 740 | 696 | 580 | 451 |
|                   | 50% 75-105 $\mu\text{m}$ | 3447       | 1653 | 1450 | 1009 | 950 | 881 | 800 | 721 | -   | 579 | 453 |
|                   | 60% 37-53 $\mu\text{m}$  | 3450       | 1643 | 1450 | 1007 | 950 | 882 | 800 | 750 | 696 | 580 | 451 |
|                   | 60% 75-105 $\mu\text{m}$ | 3451       | 1649 | 1450 | 1008 | 950 | 881 | 800 | 760 | 696 |     | 453 |
| 14                | GP                       | 3450       | 1651 | 1420 | 1012 | 950 | 881 | 800 | 721 | -   | 560 | 462 |
|                   | 20% 37-53 $\mu\text{m}$  | 3451       | 1649 | 1450 | 1007 | 950 | 882 | 800 | 718 | -   | 572 | 450 |
|                   | 20% 75-105 $\mu\text{m}$ | 3448       | 1651 | 1450 | 1009 | 950 | 882 | 800 | 712 | -   | 571 | 451 |
|                   | 50% 37-53 $\mu\text{m}$  | 3447       | 1647 | 1450 | 1007 | 950 | 880 | 800 | 740 | 696 | 579 | 450 |
|                   | 50% 75-105 $\mu\text{m}$ | 3447       | 1650 | 1450 | 1005 | 950 | 880 | 800 | 760 | -   | 580 | 451 |
|                   | 60% 37-53 $\mu\text{m}$  | 3450       | 1645 | 1450 | 1005 | 950 | 880 | 800 | 760 | 697 | 578 | 451 |
|                   | 60% 75-105 $\mu\text{m}$ | 3450       | 1646 | 1450 | 1005 | 950 | 880 | 800 | 760 | 697 | 580 | 453 |
| 28                | GP                       | 3448       | 1651 | 1420 | 1008 | 950 | 880 | 800 | 722 | -   | 580 | 462 |
|                   | 20% 37-53 $\mu\text{m}$  | 3452       | 1646 | 1430 | 1007 | 950 | 882 | 800 | 712 | -   | 580 | 450 |
|                   | 20% 75-105 $\mu\text{m}$ | 3449       | 1651 | 1430 | 1007 | 950 | 882 | 800 | 720 | -   | 572 | 451 |
|                   | 50% 37-53 $\mu\text{m}$  | 3446       | 1647 | 1450 | 1005 | 950 | 881 | 800 | 720 | -   | 580 | 452 |
|                   | 50% 75-105 $\mu\text{m}$ | 3446       | 1655 | 1450 | 1005 | 950 | 880 | 800 | 750 | 720 | 578 | 452 |
|                   | 60% 37-53 $\mu\text{m}$  | 3452       | 1645 | 1450 | 1005 | 950 | 880 | 800 | 760 | 696 | 581 | 450 |
|                   | 60% 75-105 $\mu\text{m}$ | 3451       | 1649 | 1450 | 1005 | 950 | 880 | 800 | 720 | 696 | 581 | 453 |

**Table S1.** FT-IR table peaks of MK, WG, GP and GP/WG (20, 50 and 60%) at different curing times.

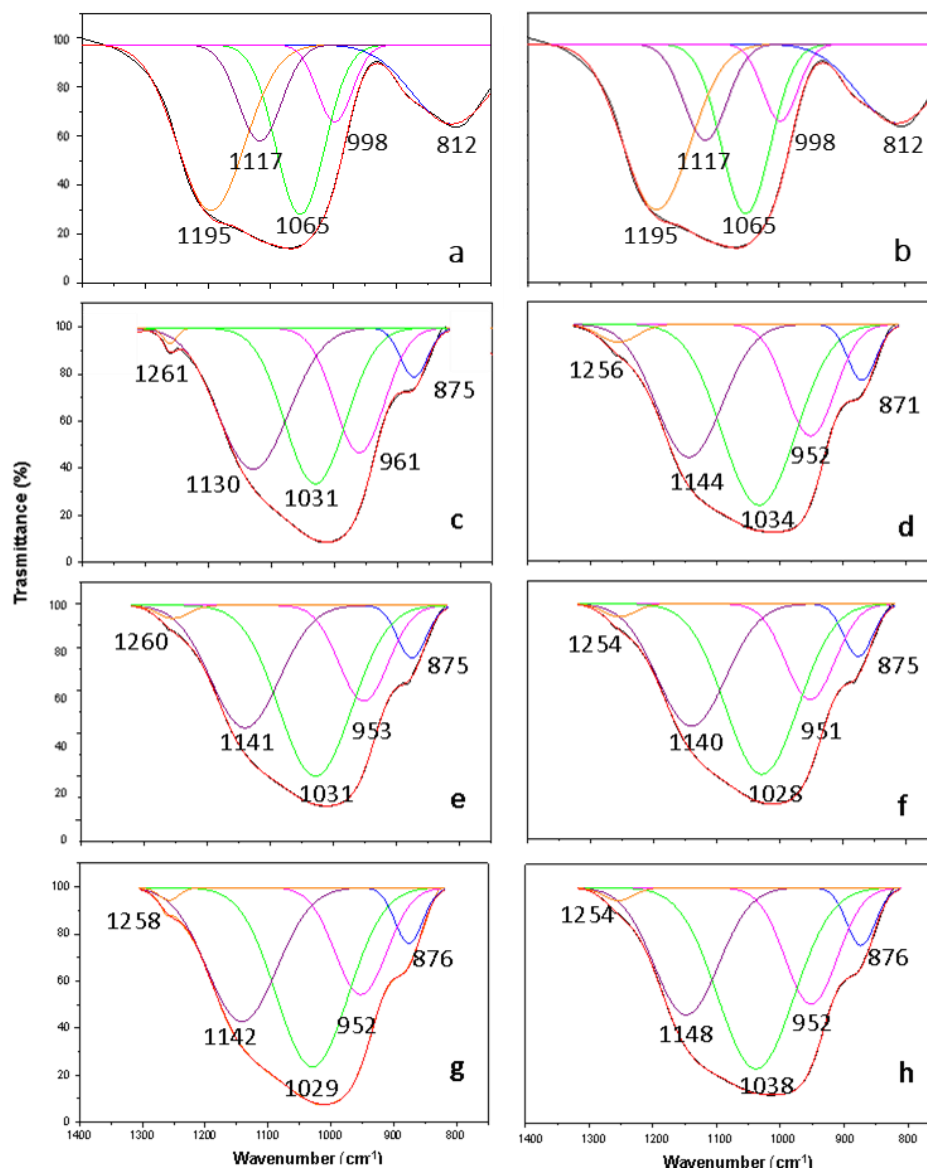

**Figure S9.** Deconvolution spectra of MK (a), GP (b), GP/WG 20%, GP/WG 50% and GP/WG 60% (c, e, g respectively) for 37-53  $\mu\text{m}$  and GP/WG 20%, GP/WG 50% and GP/WG 60% (d, f, h respectively) 75-105  $\mu\text{m}$  progression. All the samples were cured at 28 days.

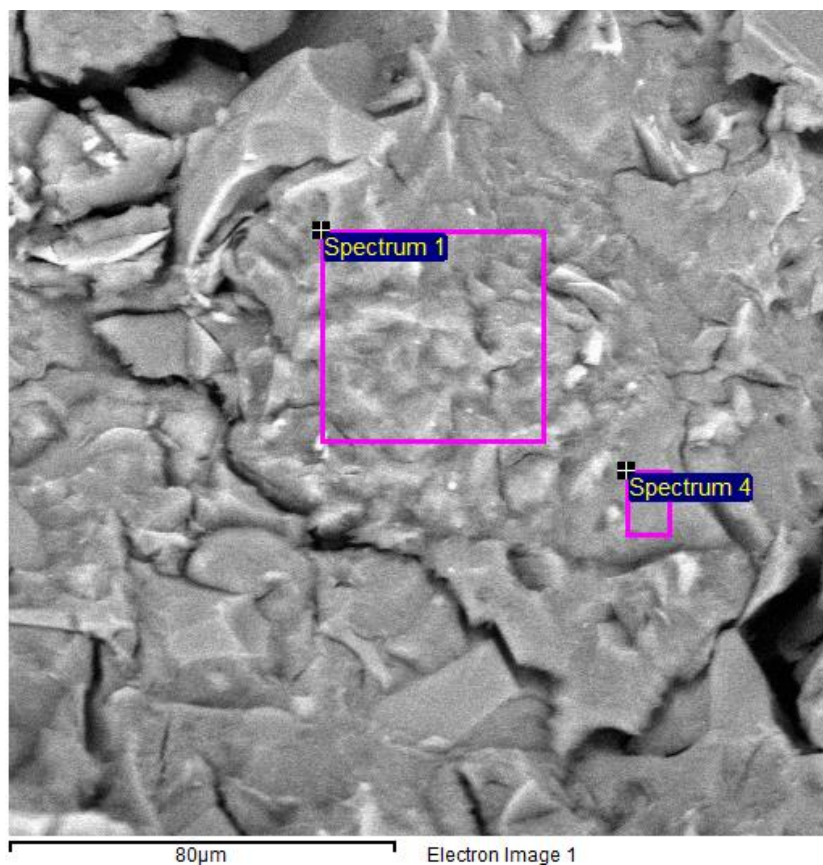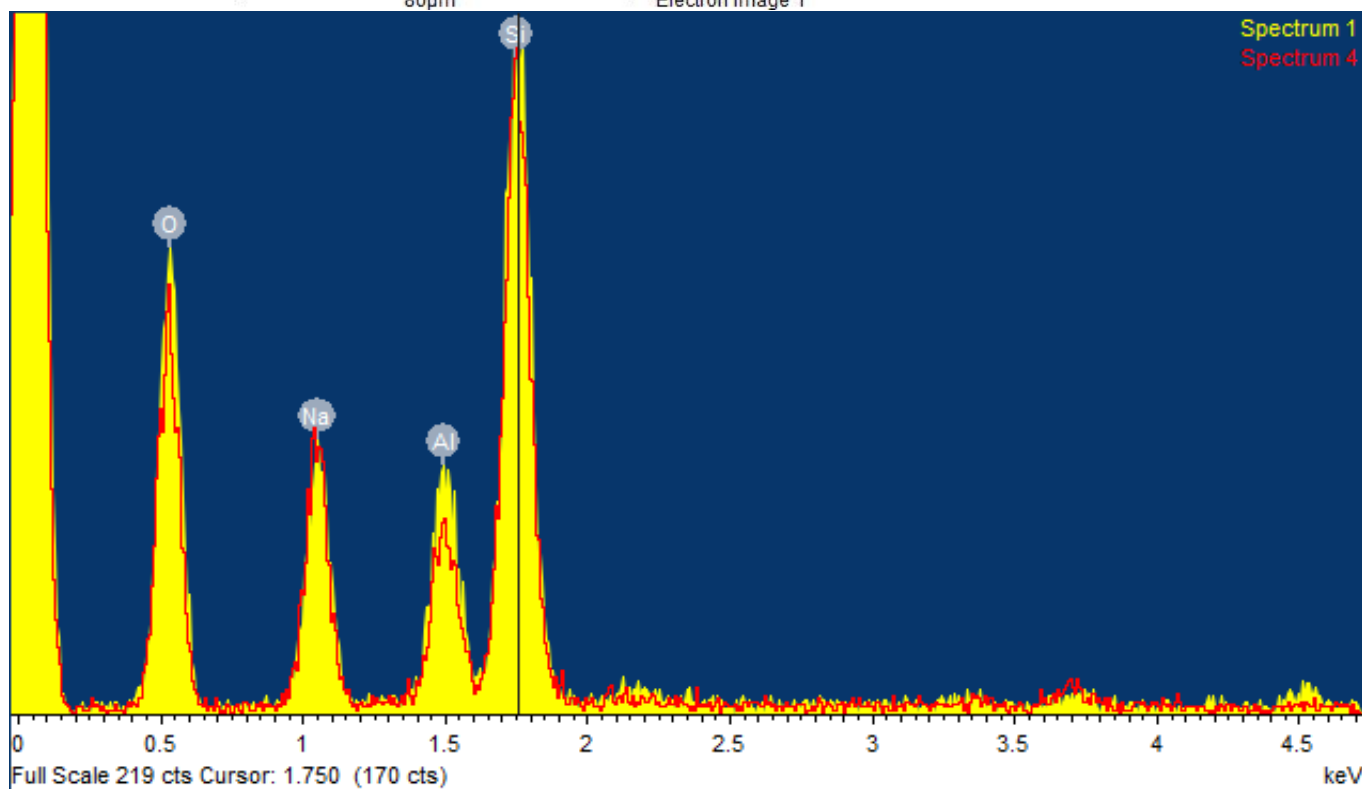

**Figure S10:** Presence of elements in MK-based geopolymers samples: (A) SEM image and (B) EDS spectra.
